# Supplementary material for: Atrial Fibrillation in Heart Failure Is Associated with High Levels of Circulating microRNA-199a-5p and 22–5p and a Defective Regulation of Intracellular Calcium and Cell-to-Cell Communication
Source: MDPI journal article supplement (doi:10.3390/ijms221910377), 2021-09-26
Supplement: s1 [file s1]

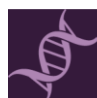

Article

# Atrial Fibrillation in Heart Failure Is Associated With High Levels of Circulating microRNA-199a-5p and 22-5p and a Defective Regulation of Intracellular Calcium and Cell-to-Cell Communication

Anna Garcia-Elias <sup>1,2,\*</sup>, Marta Tajés <sup>2,3</sup>, Laia Yañez-Bisbe <sup>1,2</sup>, Cristina Enjuanes <sup>3,4</sup>, Josep Comín-Colet <sup>3,4,5</sup>, Selma A. Serra <sup>6</sup>, José M. Fernández-Fernández <sup>6</sup>, Kathryn W. Aguilar-Agon <sup>7</sup>, Svetlana Reilly <sup>7</sup>, Julio Martí-Almor <sup>2,8,9</sup> and Begoña Benito <sup>1,2,9,10,11,\*</sup>

## SUPPLEMENTARY TABLES

**Table S1.** Characteristics of the first cohort.

|                                       | permAF (n = 9) | SR (n = 9)  | p-Value |
|---------------------------------------|----------------|-------------|---------|
| <b><i>Patient Characteristics</i></b> |                |             |         |
| Sex, men (%)                          | 5 (55.5)       | 5 (55.5)    | NS      |
| Age, y (SD)                           | 74.9 (8.2)     | 75.2 (7.0)  | NS      |
| BMI, kg/m <sup>2</sup> (SD)           | 26.8 (2.6)     | 26.8 (2.8)  | NS      |
| <b><i>Medical history</i></b>         |                |             |         |
| Tobacco history (%)                   | 4 (44.4)       | 5 (55.5)    | NS      |
| Hypertension (%)                      | 7 (77.8)       | 7 (77.8)    | NS      |
| Diabetes (%)                          | 2 (22.2)       | 6 (66.7)    | NS      |
| Hypercholesterolemia (%)              | 4 (44.4)       | 7 (77.8)    | NS      |
| COPD (%)                              | 2 (22.2)       | 1 (11.1)    | NS      |
| CKD (%)                               | 2 (22.2)       | 2 (22.2)    | NS      |
| Previous stroke (%)                   | 2 (22.2)       | 2 (22.2)    | NS      |
| <b><i>HF parameters</i></b>           |                |             |         |
| Ischemic etiology (%)                 | 4 (44.4)       | 4 (44.4)    | NS      |
| Heart rate, bpm (SD)                  | 70.2 (13.4)    | 80.0 (16.3) | NS      |
| NYHA class (%):                       |                |             | NS      |
| - I-II                                | 6              | 6           |         |
| - III-IV                              | 3              | 3           |         |
| LVEF, % (SD)                          | 32.0 (6.5)     | 28.1 (5.6)  | NS      |
| Log Pro-BNP, mean (SD)                | 3.4 (0.5)      | 3.2 (0.6)   | NS      |
| <b><i>HF treatment</i></b>            |                |             |         |
| ACEI/ARB (%)                          | 8 (88.9)       | 8 (88.9)    | NS      |
| Betablockers (%)                      | 9 (100)        | 9 (100)     | NS      |
| Diuretics (%)                         | 9 (100)        | 9 (100)     | NS      |
| <b><i>Heart rhythm</i></b>            |                |             |         |
| Permanent SR                          | 0              | 9           |         |
| History of parox/pers AF*             | 0              | 0           |         |
| Permanent AF <sup>#</sup>             | 9              | 0           |         |

BMI: body mass index; COPD: chronic obstructive pulmonary disease; CKD: chronic kidney disease; NYHA: New York Heart Association; LVEF: left ventricular ejection fraction; ACEI: angiotensin-converting-enzyme inhibitors; ARB: angiotensin-receptor blockers; SR: sinus rhythm; AF: atrial fibrillation. \*Includes episodes of paroxysmal or short-standing persistent AF; #includes long-standing (> 1 year) persistent or permanent AF. NS: non-significant.

**Table S2.** MicroRNAs differentially expressed in the discovery phase.

| miRNA              | p-Value         | miRNA             | p-Value         | miRNA           | p-Value         |
|--------------------|-----------------|-------------------|-----------------|-----------------|-----------------|
| miR-505#           | 0.000701        | miR-1             | 0.010444        | miR-140         | 0.024151        |
| miR-20a            | 0.002003        | miR-151-5P        | 0.010454        | miR-671-3p      | 0.024503        |
| miR-539            | 0.002037        | miR-645           | 0.011216        | miR-664         | 0.024804        |
| <b>miR-425#</b>    | <b>0.002114</b> | miR-7#            | 0.011294        | miR-195         | 0.025214        |
| <b>miR-106a</b>    | <b>0.002469</b> | miR-93#           | 0.011334        | miR-9#          | 0.025847        |
| miR-30d#           | 0.002633        | miR-130b#         | 0.012461        | miR-124a        | 0.026115        |
| <b>miR-19a</b>     | <b>0.004109</b> | miR-186           | 0.012493        | miR-495         | 0.026444        |
| <b>miR-16</b>      | <b>0.004259</b> | miR-652           | 0.012506        | miR-151-3p      | 0.026993        |
| miR-628-3p         | 0.004991        | <b>miR-26a</b>    | <b>0.012758</b> | <b>miR-106b</b> | <b>0.029477</b> |
| <b>miR-199a-5p</b> | <b>0.006002</b> | miR-432           | 0.014040        | miR-340         | 0.030723        |
| <b>miR-301</b>     | <b>0.006242</b> | let-7d            | 0.014543        | miR-185         | 0.033889        |
| <b>miR-374</b>     | <b>0.006285</b> | <b>miR-23a</b>    | <b>0.014962</b> | miR-411         | 0.035389        |
| <b>miR-133a</b>    | <b>0.006676</b> | miR-636           | 0.015891        | miR-590-3P      | 0.035525        |
| miR-374-5p         | 0.007119        | <b>miR-20a#</b>   | <b>0.016181</b> | miR-98          | 0.035920        |
| miR-330            | 0.007449        | <b>miR-324-5p</b> | <b>0.016251</b> | miR-30e-3p      | 0.035936        |
| <b>miR-126#</b>    | <b>0.007465</b> | miR-191#          | 0.016514        | miR-1180        | 0.036382        |
| <b>miR-17</b>      | <b>0.007740</b> | miR-140-3p        | 0.016646        | miR-27a         | 0.037929        |
| miR-142-5p         | 0.007847        | miR-625           | 0.017292        | miR-331-5p      | 0.040697        |
| miR-1255B          | 0.008360        | miR-483-3p        | 0.017459        | miR-656         | 0.042341        |
| miR-598            | 0.008435        | miR-744           | 0.018172        | miR-107         | 0.043088        |
| miR-26a-1#         | 0.008641        | miR-489           | 0.018316        | miR-331         | 0.043250        |
| <b>miR-27b</b>     | <b>0.008667</b> | miR-24            | 0.019166        | miR-326         | 0.043429        |
| <b>miR-22-5p</b>   | <b>0.008810</b> | miR-28            | 0.019784        | miR-146b        | 0.043554        |
| miR-148b           | 0.009361        | miR-380-3p        | 0.021854        | miR-221         | 0.046365        |
| miR-191            | 0.010162        | miR-580           | 0.023425        | miR-15b         | 0.048038        |
| <b>miR-125a-5p</b> | <b>0.010217</b> |                   |                 |                 |                 |

miRNA selected for the replication phase are marked in bold.

**Table S3.** Characteristics of the donors of atrial tissue.

| Tissue Collection Site           | LAA         |             | RAA         |             |
|----------------------------------|-------------|-------------|-------------|-------------|
|                                  | No AF       | AF          | No AF       | AF          |
| <b>Total number of patients</b>  | 6           | 6           | 5           | 5           |
| Mean age, years ( $\pm$ SD)      | 60 $\pm$ 14 | 66 $\pm$ 12 | 64 $\pm$ 10 | 68 $\pm$ 12 |
| Men, n (%)                       | 4 (67)      | 5 (83)      | 4 (80)      | 5 (100)     |
| <b>Surgical procedure, n (%)</b> |             |             |             |             |
| CABG $\pm$ AVR/MVR               | 2 (33)      | 1 (17)      | 2 (40)      | 1 (20)      |
| AVR/MVR                          | 4 (67)      | 5 (83)      | 3 (60)      | 4 (80)      |
| <b>Medical history, n (%)</b>    |             |             |             |             |
| Smoker/ex-smoker                 | 4 (67)      | 2 (33)      | 3 (60)      | 1 (20)      |
| Hypertension                     | 3 (50)      | 3 (50)      | 2 (40)      | 3 (60)      |
| Diabetes mellitus                | 2 (33)      | 0 (0)       | 0 (0)       | 0 (0)       |
| Previous MI                      | 1 (17)      | 2 (33)      | 0 (0)       | 0 (0)       |
| COPD/asthma                      | 0 (0)       | 0 (0)       | 0 (0)       | 0 (0)       |
| <b>Medications, n (%)</b>        |             |             |             |             |
| Anticoagulants                   | 1 (17)      | 4 (67)      | 0 (0)       | 3 (60)      |
| $\beta$ -Blockers                | 2 (33)      | 5 (83)      | 3 (60)      | 5 (100)     |
| Statins                          | 2 (33)      | 3 (50)      | 1 (20)      | 3 (60)      |
| Calcium-channel blockers         | 0 (0)       | 0 (0)       | 0 (0)       | 1 (20)      |
| ACEIs and ARBs                   | 1 (17)      | 4 (67)      | 1 (20)      | 3 (60)      |
| Diuretics                        | 0 (0)       | 2 (33)      | 2 (40)      | 2 (40)      |

LAA, left atrial appendage; RAA, right atrial appendage; noAF, sinus rhythm; AF, atrial fibrillation; ACEI, angiotensin-converting enzyme inhibitor; ARB, angiotensin II receptor blocker; AVR, aortic valve replacement; CABG, coronary artery bypass surgery; COPD, chronic obstructive pulmonary disease; MI, myocardial infarction; MVR, mitral valve replacement. Percentage in parentheses (%) indicates percentage within the same group.

**Table S4.** MiRNA primer sequences for atrial tissue.

| No AF | AF |
|-------|----|
|-------|----|

| Assay Name      | Assay ID   | Target Sequence 5'-3'   |
|-----------------|------------|-------------------------|
| hsa-miR-22-5p   | 477987_mir | AGUUCUUCAGUGGCAAGCUUUA  |
| hsa-miR-199a-5p | 478231_mir | CCCAGUGUUCAGACUACCUGUUC |
| hsa-miR-191-5p  | 477952_mir | CAACGGAAUCCCAAAAGCAGCUG |
| hsa-miR-26a-5p  | 477995_mir | UUCAAGUAAUCCAGGAUAGGCU  |

## SUPPLEMENTARY FIGURES

FIG.S1

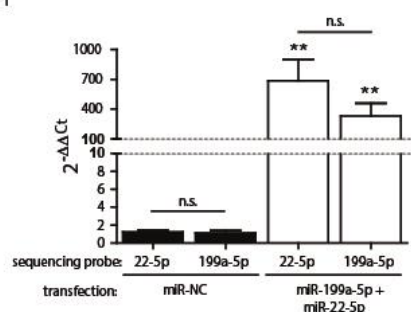

FIG.S2

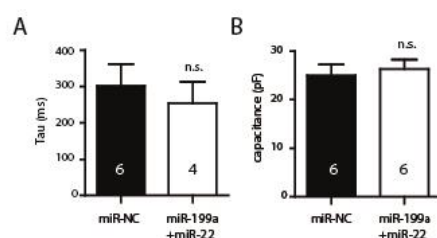

FIG.S3

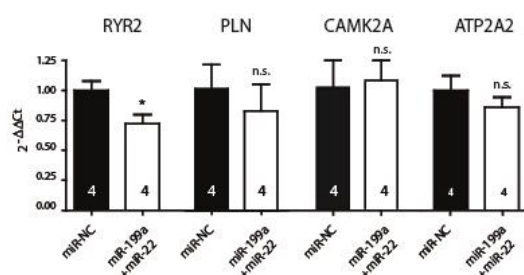

**Figure S1.** RNA expression levels of miR-22-5p and miR-199a-5p in HL1 cells transfected with miR-199a+miR-22 or miR-NC. Specific probes for each miRNA were used. Data are expressed as the fold change ( $2^{-\Delta\Delta C_t}$ ) relative to the negative control, miR-NC. **Figure S2.** A. Fast inactivation kinetics (Tau) of  $I_{CaL}$  currents and, B. cell capacitance of HL-1 cells transfected with miR-199a+miR-22 (white) or miR-NC (black). Numbers within the columns represent number of patched cells. **Figure S3.** RYR2, PLN, CAMK2A and ATP2A2 mRNA expression levels in miR-199a+miR-22 HL-1 cells, normalized to miR-NC. n.s.: non-significant, \*  $p < 0.05$ , \*\*  $p < 0.005$ .
